# Supplementary material
Source: PubMed Central journal article supplement (PMC6518412)

No Evidence That G6PD Deficiency Affects the Efficacy or Hematologic Safety of Daunorubicin in  
Acute Lymphoblastic Leukemia Induction Therapy

Katherine M. Robinson<sup>1</sup>, Wenjian Yang<sup>1</sup>, Seth E. Karol<sup>2</sup>, Nancy Kornegay<sup>1</sup>, Dennis Jay<sup>3</sup>, Cheng Cheng<sup>4</sup>,  
John K. Choi<sup>3</sup>, Dario Campana<sup>5</sup>, Ching-Hon Pui<sup>2</sup>, Brent Wood<sup>6</sup>, Michael J. Borowitz<sup>7</sup>, Julie Gastier-  
Foster<sup>8</sup>, Eric C. Larsen<sup>9</sup>, Naomi Winick<sup>10</sup>, William L. Carroll<sup>11</sup>, Mignon L. Loh<sup>12</sup>, Elizabeth A. Raetz<sup>11</sup>,  
Stephen P. Hunger<sup>13</sup>, Meenakshi Devidas<sup>14</sup>, Elaine R. Mardis<sup>8</sup>, Robert S. Fulton<sup>15</sup>, Mary V. Relling<sup>1</sup>,  
Sima Jeha<sup>2</sup>

1 Department of Pharmaceutical Sciences, St. Jude Children's Research Hospital, Memphis, TN; 2  
Department of Oncology, St. Jude Children's Research Hospital, Memphis, TN; 3 Department of  
Pathology, St. Jude Children's Research Hospital, Memphis, TN; 4 Department of Biostatistics, St. Jude  
Children's Research Hospital, Memphis, TN; 5 Department of Paediatrics, National University of  
Singapore, Singapore; 6 Department of Laboratory Medicine, Seattle Children's Hospital, Seattle, WA; 7  
Department of Hematologic Pathology, John's Hopkins University, Baltimore, MD; 8 The Ohio State  
University and Nationwide Children's Hospital, Columbus, Ohio; 9 Department of Pediatric  
Hematology-Oncology, Maine Medical Center, Scarborough, ME; 10 Department of Pediatrics, UT  
Southwestern Medical Center, Dallas, TX; 11 Perlmutter Cancer Center, Department of Pediatrics, NYU  
Langone Medical Center, New York, New York; 12 Department of Pediatrics, Benioff Children's  
Hospital and the Helen Diller Family Comprehensive Cancer Center, University of California San  
Francisco, San Francisco, CA; 13 Department of Pediatrics, Children's Hospital of Philadelphia,  
Philadelphia, PA; 14 Department of Biostatistics, University of Florida, Gainesville, FL; 15 Department  
of Genetics, Washington University School of Medicine, St. Louis, MO

Supporting Information

Supporting Information Table S1 Prognostic Factors at Diagnosis for St. Jude Cohorts

|                |                     | G6PD Normal |        | G6PD Deficient |       | <i>P</i> -value      |
|----------------|---------------------|-------------|--------|----------------|-------|----------------------|
|                |                     |             | (%)    |                | (%)   |                      |
| Race           | Black               | 115         | 16.34% | 13             | 59.1% | 2.6x10 <sup>-6</sup> |
|                | Hispanic            | 78          | 11.08% | 0              | 0.0%  |                      |
|                | Other               | 57          | 8.10%  | 4              | 18.2% |                      |
|                | White               | 454         | 64.49% | 5              | 22.7% |                      |
| Age (years)    | ≥10                 | 202         | 28.69% | 7              | 31.8% | 0.81                 |
|                | <10                 | 502         | 71.31% | 15             | 68.2% |                      |
| WBC (cells/ml) | ≥50x10 <sup>9</sup> | 152         | 21.59% | 3              | 13.6% | 0.60                 |
|                | <50x10 <sup>9</sup> | 552         | 78.41% | 19             | 86.4% |                      |
| DNA Index      | ≥1.16               | 172         | 24.43% | 16             | 72.7% | 0.80                 |
|                | <1.16               | 532         | 75.57% | 6              | 27.3% |                      |
| Lineage        | B                   | 580         | 82.39% | 21             | 95.5% | 0.151                |
|                | T                   | 124         | 17.61% | 1              | 4.5%  |                      |

**Supporting Information Table S2 G6PD Status and Day 15/19 MRD at 2 Different MRD Thresholds in St Jude Cohorts.**

| Protocol      | G6PD Status | MRD $\geq$ 1% (n (%)) | MRD < 1% (n (%)) | Total number of patients | P-value (Fisher's Exact) |
|---------------|-------------|-----------------------|------------------|--------------------------|--------------------------|
| All patients  | Deficient   | 6 (30.0%)             | 14 (70.0%)       | 20                       | 1                        |
|               | Normal      | 201 (28.7%)           | 499 (71.3%)      | 700                      |                          |
| Total XV      | Deficient   | 1 (16.7%)             | 5 (83.3%)        | 6                        | 1                        |
|               | Normal      | 38 (22.6%)            | 130 (77.4%)      | 168                      |                          |
| Total XVI     | Deficient   | 5 (35.7%)             | 9 (64.3%)        | 14                       | 0.77                     |
|               | Normal      | 163 (30.6%)           | 369 (69.4%)      | 532                      |                          |
| Std/High Risk | Deficient   | 4 (50.0%)             | 4 (50.0%)        | 8                        | 0.73                     |
|               | Normal      | 137(42.8%)            | 183 (57.2%)      | 320                      |                          |
| Low Risk      | Deficient   | 2 (16.7%)             | 10 (83.3%)       | 12                       | 1                        |
|               | Normal      | 64 (16.8%)            | 316 (83.2%)      | 380                      |                          |
| Blacks Only   | Deficient   | 4 (33.3%)             | 8 (66.7%)        | 12                       | 1                        |
|               | Normal      | 39 (32.2%)            | 82 (67.8%)       | 121                      |                          |
| Males Only    | Deficient   | 4 (33.3%)             | 8 (66.7%)        | 12                       | 0.76                     |
|               | Normal      | 121 (30.2%)           | 279 (69.8%)      | 400                      |                          |
| Females Only  | Deficient   | 2 (25.0%)             | 6 (75.0%)        | 8                        | 1                        |
|               | Normal      | 80 (26.7%)            | 220 (73.3%)      | 300                      |                          |

| Protocol      | G6PD Status | MRD $\geq$ 0.1% (n (%)) | MRD < 0.1% (n (%)) | Total number of patients | P-value (Fisher's Exact) |
|---------------|-------------|-------------------------|--------------------|--------------------------|--------------------------|
| All patients  | Deficient   | 16 (80.0)               | 4 (20.0%)          | 20                       | 0.33                     |
|               | Normal      | 469 (67.0%)             | 231 (33.0%)        | 700                      |                          |
| Total XV      | Deficient   | 4 (66.7%)               | 2 (33.3%)          | 6                        | 1                        |
|               | Normal      | 105 (62.5%)             | 63 (37.5%)         | 168                      |                          |
| Total XVI     | Deficient   | 12 (85.7%)              | 2 (14.3%)          | 14                       | 0.24                     |
|               | Normal      | 364 (68.4%)             | 168 (31.6%)        | 532                      |                          |
| Std/High Risk | Deficient   | 8 (100%)                | 0                  | 8                        | 0.21                     |
|               | Normal      | 247 (77.2%)             | 73 (22.8%)         | 320                      |                          |
| Low Risk      | Deficient   | 8 (66.7%)               | 4 (33.3%)          | 12                       | 0.77                     |
|               | Normal      | 222 (58.5%)             | 158 (41.5%)        | 380                      |                          |
| Blacks        | Deficient   | 10 (83.3%)              | 2 (16.7%)          | 12                       | 0.34                     |
|               | Normal      | 78 (64.5%)              | 43 (35.5%)         | 121                      |                          |
| Males         | Deficient   | 10 (83.3)               | 2 (16.7%)          | 12                       | 0.36                     |
|               | Normal      | 274 (68.5%)             | 126 (31.5%)        | 400                      |                          |
| Females       | Deficient   | 6 (75.0)                | 2 (25.0%)          | 8                        | 0.72                     |
|               | Normal      | 195 (65.0%)             | 105 (35.0%)        | 300                      |                          |

Supporting Information Table S3 G6PD Status and End of Induction MRD in St Jude Cohorts.

| Protocol      | G6PD Status | MRD $\geq 0.01\%$<br>(n (%)) | MRD $<0.01\%$<br>(n (%)) | Total number of patients | <i>P</i> -value<br>(Fisher's Exact) |
|---------------|-------------|------------------------------|--------------------------|--------------------------|-------------------------------------|
| All patients  | Deficient   | 2 (9.1%)                     | 20 (90.9%)               | 22                       | 0.76                                |
|               | Normal      | 104 (14.9%)                  | 592 (85.1%)              | 696                      |                                     |
| Total XV      | Deficient   | 0 (0%)                       | 6 (100%)                 | 6                        | 0.35                                |
|               | Normal      | 35 (21.1%)                   | 131 (78.9%)              | 166                      |                                     |
| Total XVI     | Deficient   | 2 (12.5%)                    | 14 (87.5%)               | 16                       | 1                                   |
|               | Normal      | 69 (13.0%)                   | 461 (87.0%)              | 530                      |                                     |
| Std/High Risk | Deficient   | 1 (11.1%)                    | 8 (88.9%)                | 9                        | 0.69                                |
|               | Normal      | 72 (22.5%)                   | 244 (77.5%)              | 316                      |                                     |
| Low Risk      | Deficient   | 1 (7.7%)                     | 12 (92.3%)               | 13                       | 1                                   |
|               | Normal      | 32 (8.4%)                    | 348 (91.6%)              | 380                      |                                     |
| Blacks        | Deficient   | 2 (15.4%)                    | 11 (84.6%)               | 13                       | 1                                   |
|               | Normal      | 19 (15.8%)                   | 101 (84.2%)              | 120                      |                                     |
| Males         | Deficient   | 1 (7.1%)                     | 13 (92.9%)               | 14                       | 0.70                                |
|               | Normal      | 61 (15.0%)                   | 340 (85.0%)              | 401                      |                                     |
| Females       | Deficient   | 1 (12.5%)                    | 7 (87.5%)                | 8                        | 1                                   |
|               | Normal      | 43 (14.6%)                   | 252 (85.4%)              | 295                      |                                     |

Supporting Information Table S4 Prognostic Factors at Diagnosis in the COG AALL0232 Cohort

|                   |                     | G6PD<br>Normal |        | G6PD<br>Deficient |     | P-value               |
|-------------------|---------------------|----------------|--------|-------------------|-----|-----------------------|
|                   |                     |                | (%)    |                   | (%) |                       |
| Race              | Black               | 55             | 4.70%  | 13                | 65% | 4.3x10 <sup>-15</sup> |
|                   | Hispanic            | 307            | 26.20% | 3                 | 15% |                       |
|                   | Other               | 167            | 14.30% | 4                 | 20% |                       |
|                   | White               | 643            | 54.80% | 0                 | 0%  |                       |
| Age<br>(years)    | ≥10                 | 778            | 66.40% | 14                | 70% | 0.82                  |
|                   | <10                 | 394            | 33.60% | 6                 | 30% |                       |
| WBC<br>(cells/ml) | ≥50x10 <sup>9</sup> | 507            | 43.20% | 8                 | 40% | 0.82                  |
|                   | <50x10 <sup>9</sup> | 665            | 56.80% | 12                | 60% |                       |
| DNA<br>Index      | ≥1.16               | 200            | 17.10% | 4                 | 20% | 0.76                  |
|                   | <1.16               | 969            | 82.90% | 16                | 80% |                       |

Supporting Information Table S5 Minor Allele Frequency (MAF) of SNPs Observed in the *G6PD* Gene in the COG AALL0232 Protocol (Males and Females, n=2139)

| Location (hg19, chrX) <sup>a</sup> | dbSNP <sup>b</sup> | Common Name | Amino Acid Substitution | WHO Classification | MAF (all) | MAF whites | MAF blacks | MAF Hispanics | MAF Other |
|------------------------------------|--------------------|-------------|-------------------------|--------------------|-----------|------------|------------|---------------|-----------|
| 153760923                          | rs138746997        | NA          | His412Gln               | Unknown            | 0.00032   | 0.00059    | 0          | 0             | 0         |
| 153761160                          | rs34193178         | Mira d'Aire | Asp380His               | Class IV           | 0.00097   | 0          | 0.013      | 0             | 0.0022    |
| 153761240                          | rs76723693         | A-,968      | Leu353Pro               | Class III          | 0.00097   | 0          | 0          | 0.0025        | 0.0022    |
| 153761261                          | rs370017540        | NA          | Gly346Asp               | Unknown            | 0.00032   | 0.00059    | 0          | 0             | 0         |
| 153761337                          | rs137852327        | Viangchan   | Val321Met               | Class II           | 0.00032   | 0          | 0          | 0             | 0.0022    |
| 153762269                          | rs782324339        | NA          | Asp281Asn               | Unknown            | 0.00032   | 0          | 0          | 0.0013        | 0         |
| 153762317                          | rs782757170        | NA          | Leu265Phe               | Unknown            | 0.00032   | 0          | 0          | 0             | 0.0022    |
| 153762340                          | rs137852328        | Mexico City | Arg257Gln               | Class III          | 0.00032   | 0.00059    | 0          | 0             | 0         |
| 153762615                          | rs145247580        | NA          | Asp224Glu               | Unknown            | 0.00065   | 0.0012     | 0          | 0             | 0         |
| 153763391                          | rs370918918        | NA          | Met189Ile               | Unknown            | 0.00032   | 0.00059    | 0          | 0             | 0         |
| 153763402                          | rs137852313        | Ilesha      | Glu186Lys               | Class III          | 0.00065   | 0          | 0          | 0.0025        | 0         |
| 153763405                          | NA                 | NA          | His185Asp               | Unknown            | 0.00032   | 0          | 0          | 0.0013        | 0         |
| 153763485                          | rs78365220         | NA          | Leu158Pro               | Unknown            | 0.00032   | 0.00059    | 0          | 0             | 0         |
| 153763492                          | rs1050829          | A           | Asn156Asp               | Class IV           | 0.02950   | 0.00059    | 0.34       | 0.018         | 0.051     |
| 153764199                          | rs781848254        | NA          | Arg104Cys               | Unknown            | 0.00032   | 0          | 0          | 0.0013        | 0         |
| 153764217                          | rs1050828          | Asahi       | Val98Met                | Class III          | 0.013     | 0          | 0.17       | 0.0038        | 0.024     |

<sup>a</sup> GRCh37.p13

<sup>b</sup> National Center for Biotechnology Information dbSNP database.

<sup>c</sup> NP\_00393.4

<sup>d</sup> Yoshida A, Beutler E, Motusky AG. Human glucose-6-phosphate-dehydrogenase variants. Bulletin of the World Health Organization. 1971; 45(2): 243-53.

Supporting Information Table S6 Minor Allele Frequency (MAF) of SNPs Observed in the *G6PD* Gene in Male Patients in the COG AALL0232 Protocol (n=1193)

| Location (hg19, chrX) <sup>a</sup> | dbSNP <sup>b</sup> | Common Name | Amino Acid Substitution | WHO Classification | MAF (all) | MAF whites | MAF blacks | MAF Hispanics | MAF Other |
|------------------------------------|--------------------|-------------|-------------------------|--------------------|-----------|------------|------------|---------------|-----------|
| 153761240                          | rs76723693         | A-,968      | Leu353Pro               | Class III          | 0.0017    | 0          | 0          | 0.0065        | 0         |
| 153761337                          | rs137852327        | Viangchan   | Val321Met               | Class II           | 0.00084   | 0          | 0          | 0             | 0.0058    |
| 153763402                          | rs137852313        | Ilesha      | Glu186Lys               | Class III          | 0.00084   | 0          | 0          | 0.0032        | 0         |
| 153763485                          | rs78365220         | NA          | Leu158Pro               | Unknown            | 0.00084   | 0.0016     | 0          | 0             | 0         |
| 153763492                          | rs1050829          | A           | Asn156Asp               | Class IV           | 0.0335    | 0.0016     | 0.35       | 0.023         | 0.047     |
| 153764217                          | rs1050828          | Asahi       | Val98Met                | Class III          | 0.0134    | 0          | 0.19       | 0             | 0.017     |

<sup>a</sup> GRCh37.p13

<sup>b</sup> National Center for Biotechnology Information dbSNP database.

<sup>c</sup> NP\_00393.4

<sup>d</sup> Yoshida A, Beutler E, Motusky AG. Human glucose-6-phosphate-dehydrogenase variants. Bulletin of the World Health Organization. 1971; 45(2): 243-53.

Supporting Information Table S7 *G6PD* genotype and MRD status at Day 29 in COG AALL0232

| Patients             | <i>G6PD</i><br>Genotype<br>Status*           | MRD $\geq$ 0.1%<br>(n (%)) | MRD < 0.1%<br>(n (%)) | Total | <i>P</i> -value<br>(Fisher's<br>exact) |
|----------------------|----------------------------------------------|----------------------------|-----------------------|-------|----------------------------------------|
| Males only           | Class II-III<br>Allele                       | 3 (15.0%)                  | 17 (85.0%)            | 20    | 0.78                                   |
|                      | Class IV Allele                              | 242 (20.7%)                | 930 (79.3%)           | 1,172 |                                        |
| Non-white<br>males   | Class II-III<br>Allele                       | 3 (15.0%)                  | 17 (85.0%)            | 20    | 0.78                                   |
|                      | Class IV Allele                              | 109 (20.6%)                | 421 (79.4%)           | 530   |                                        |
| Females<br>only      | Heterozygous<br>for a Class II-III<br>allele | 5 (20.0%)                  | 20 (80.0%)            | 25    | 0.58                                   |
|                      | Homozygous<br>for Class IV<br>Alleles        | 148 (16.2%)                | 763 (83.8%)           | 911   |                                        |
| Non-white<br>females | Heterozygous<br>for a Class II-III<br>Allele | 5 (20.8%)                  | 19 (79.2%)            | 24    |                                        |
|                      | Homozygous<br>for Class IV<br>Alleles        | 75 (19.1%)                 | 318 (80.9%)           | 393   | 0.79                                   |

\* Note: no Class I or V alleles were observed



Supporting Information Figure S1. Patient demographics of St. Jude Total XV and Total XVI Cohorts

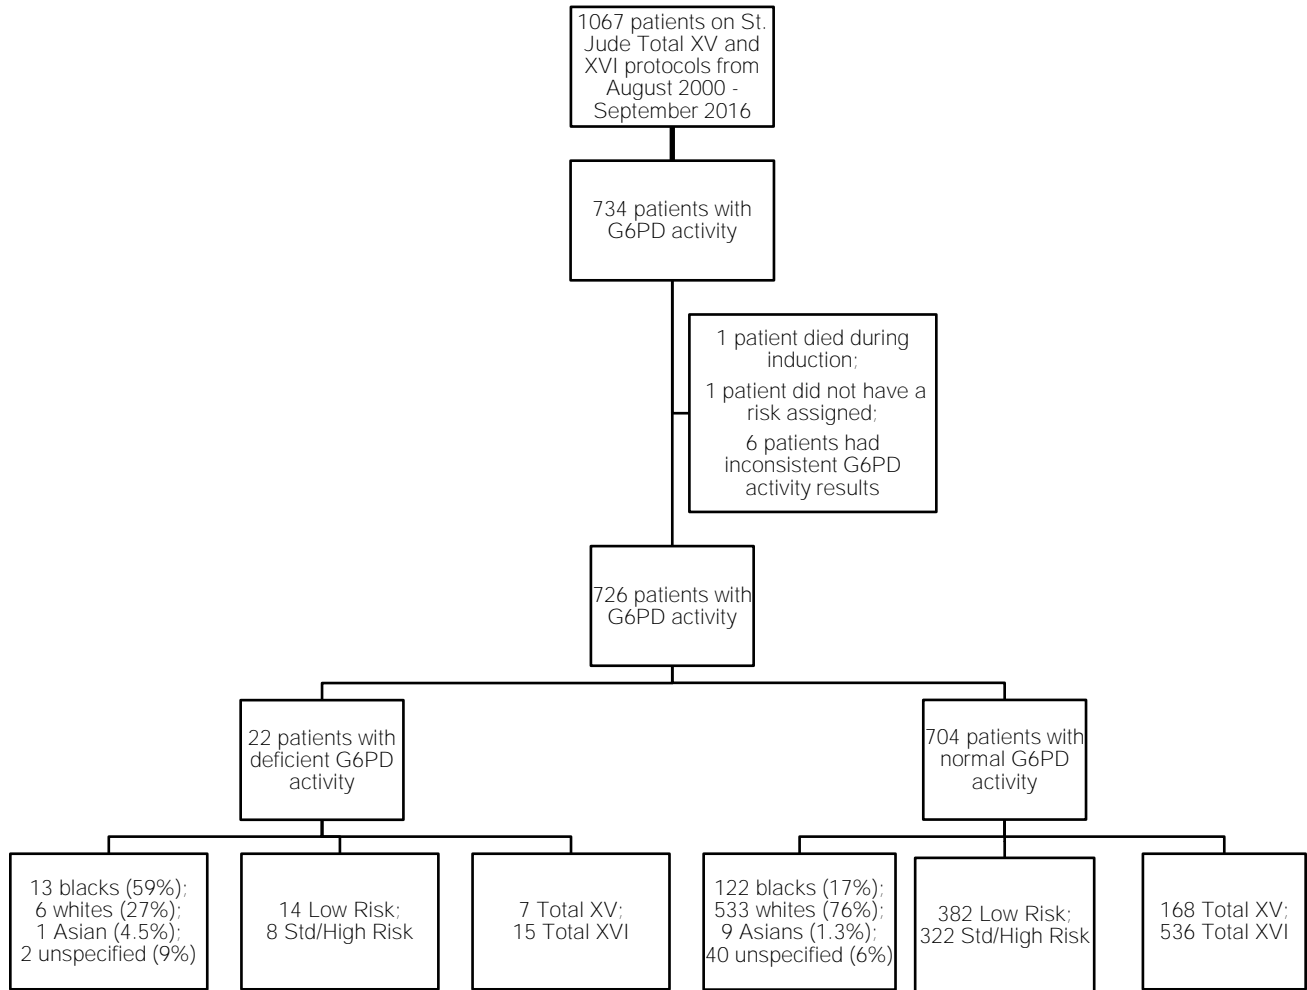

Supporting Information Figure S2. Patient demographics of COG AALL0232 cohort

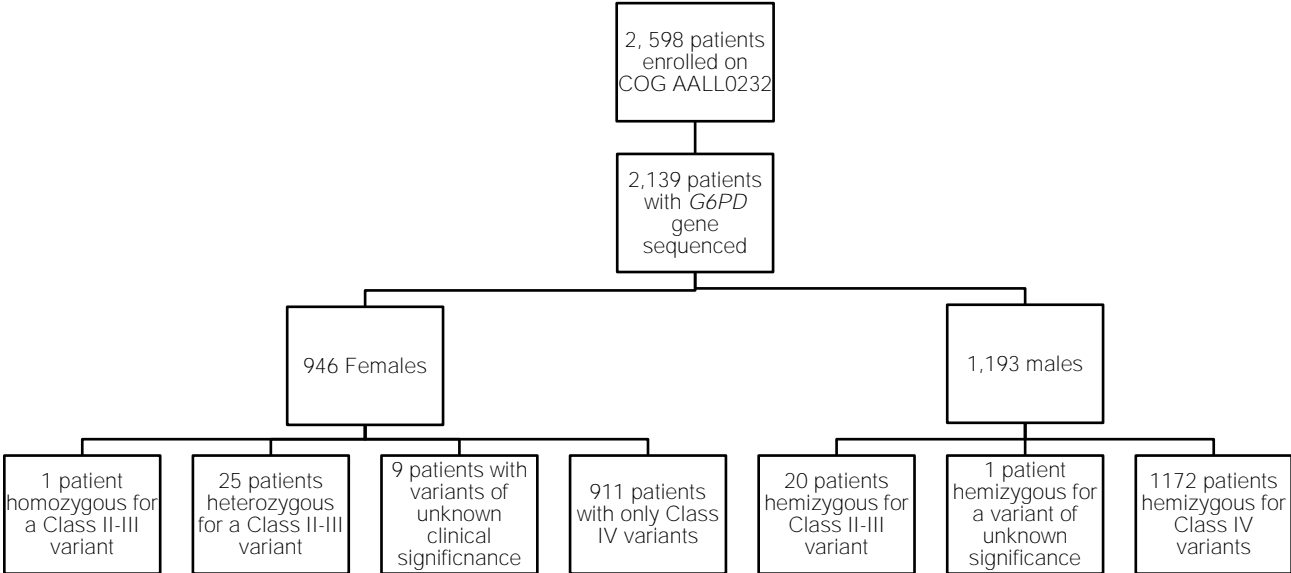

**Supporting Information Figure S3.** *G6PD* genotype does not impact Day 29 MRD in daunorubicin-containing ALL induction therapy in COG AALL0232 protocol. Minimal residual disease (MRD) was assessed by flow cytometry from bone marrow aspirates at day 29, the end of the induction phase, in the COG AALL0232 protocol. There was no difference in MRD  $\geq$  0.1% vs.  $<$ 0.1% in patients considered *G6PD* deficient by genotype compared to patients considered *G6PD* normal (15% vs. 20.7%,  $p = 0.78$ ). This held true when the analysis was restricted to non-white patients as well (15% vs. 20.6%,  $p = 0.78$ ).

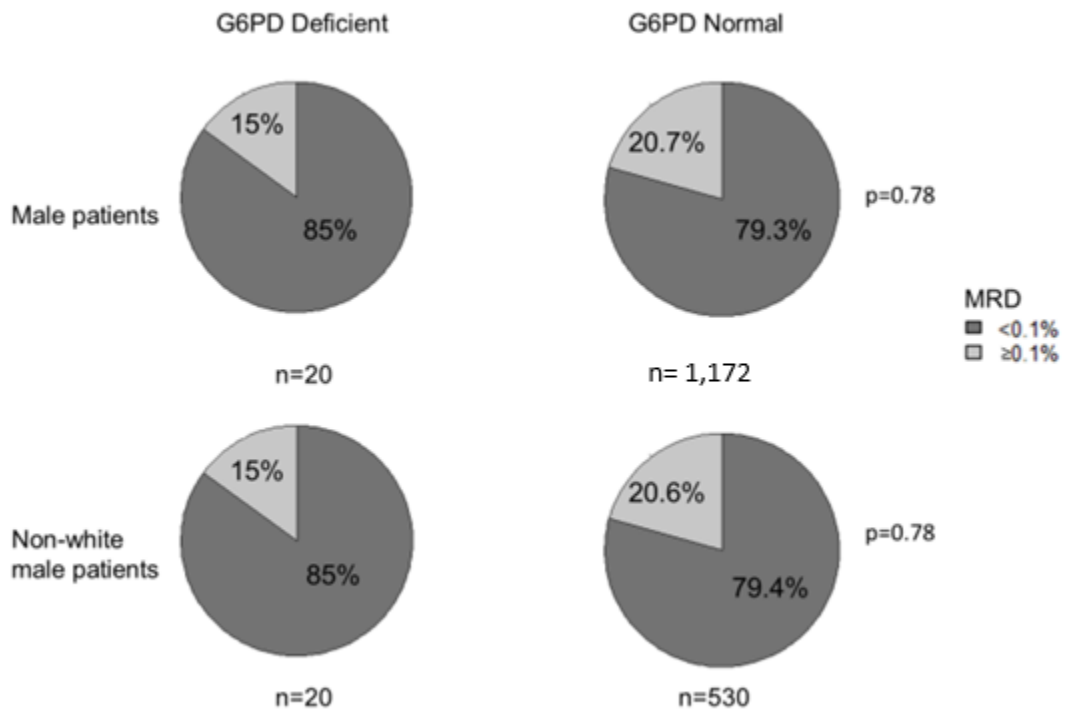

Supplement: NIHMS1020573-supplement-supp_info.pdf [file NIHMS1020573-supplement-supp_info.pdf]
